# Supplementary material for: Genetic and Environmental Contributions to the Covariation Between Cardiometabolic Traits
Source: PubMed Central journal article supplement — J Am Heart Assoc. 2018 Apr 18;7(9):e007806. doi: 10.1161/JAHA.117.007806 (PMC6015288; doi:10.1161/jaha.117.007806), 2018-04-18
Supplement: JAH3-7-e007806-s001.pdf [file JAH3-7-e007806-s001.pdf]

# **SUPPLEMENTAL MATERIAL**

**Table S1. Univariate Analyses in Twin and SNP Models.**

| Traits              | rMZ/rDZ* | BM  | a <sup>2</sup> (se) |           |           | d <sup>2</sup> (se) |           |
|---------------------|----------|-----|---------------------|-----------|-----------|---------------------|-----------|
|                     |          |     | Twin                | SNP       | LDSC†     | Twin                | SNP       |
| Triglycerides       | 2.27     | ADE | 42% (7%)*           | 31% (6%)* | 15% (2%)* | 14% (8%)            | 28% (9%)* |
| Total cholesterol   | 2.50     | ADE | 28% (8%)*           | 15% (6%)* | 15% (2%)* | 19% (8%)*           | 0% (9%)   |
| LDL                 | 2.64     | ADE | 23% (8%)*           | 16% (6%)* | 13% (2%)* | 24% (8%)*           | 0% (9%)   |
| Apolipoprotein B    | 2.24     | ADE | 39% (7%)*           | 14% (6%)* | 11% (3%)* | 14% (8%)            | 0% (9%)   |
| nonHDL              | 2.61     | ADE | 24% (8%)*           | 13% (6%)* | NA        | 25% (8%)*           | 0% (9%)   |
| HDL                 | 2.17     | AE  | 66% (2%)*           | 24% (6%)* | 16% (2%)* | -                   | 1% (9%)   |
| Apolipoprotein A1   | 1.93     | AE  | 66% (2%)*           | 17% (6%)* | 9% (3%)*  | -                   | 9% (9%)   |
| Hemoglobin          | 2.24     | ADE | 41% (7%)*           | 21% (6%)* | NA        | 15% (8%)            | 0% (9%)   |
| Hemoglobin A1c      | 2.50     | ADE | 37% (7%)*           | 20% (6%)* | 7% (1%)*  | 35% (7%)*           | 0% (9%)   |
| Glucose             | 2.55     | ADE | 24% (7%)*           | 17% (6%)* | 10% (2%)* | 30% (8%)*           | 15% (9%)  |
| Creatinine          | 2.41     | ADE | 35% (7%)*           | 18% (6%)* | 11% (2%)* | 24% (8%)*           | 0% (9%)   |
| Cystatin C          | 2.19     | ADE | 42% (7%)*           | 27% (6%)* | NA        | 18% (8%)*           | 5% (9%)   |
| eGFR                | 2.35     | ADE | 38% (7%)*           | 32% (6%)* | NA        | 21% (8%)*           | 3% (9%)   |
| C-reactive protein  | 2.19     | ADE | 30% (7%)*           | 37% (6%)* | NA        | 14% (8%)            | 0% (9%)   |
| Height              | 1.81     | ACE | 77% (3%)*           | 62% (6%)* | 27% (1%)* | -                   | 0% (9%)   |
| Weight              | 2.66     | ADE | 37% (7%)*           | 26% (6%)* | NA        | 35% (7%)*           | 11% (9%)  |
| Body mass index     | 2.80     | ADE | 28% (7%)*           | 21% (6%)* | 19% (1%)* | 41% (7%)*           | 3% (9%)   |
| Waist circumference | 3.14     | ADE | 15% (7%)*           | 16% (6%)* | 12% (0%)* | 49% (7%)*           | 19% (9%)* |
| Hip circumference   | 2.86     | ADE | 24% (7%)*           | 22% (6%)* | 13% (1%)* | 40% (8%)*           | 13% (9%)  |
| Waist-hip ratio     | 3.12     | ADE | 13% (7%)            | 19% (6%)* | 11% (1%)* | 40% (8%)*           | 3% (9%)   |
| SBP                 | 2.50     | ADE | 27% (8%)*           | 10% (6%)  | NA        | 15% (9%)            | 0% (9%)   |
| DBP                 | 2.33     | AE  | 37% (2%)*           | 8% (6%)   | NA        | -                   | 0% (10%)  |
| MAP                 | 2.50     | AE  | 39% (2%)*           | 8% (6%)   | NA        | -                   | 0% (9%)   |
| Pulse pressure      | 2.17     | AE  | 36% (2%)*           | 12% (6%)* | NA        | -                   | 2% (9%)   |

rMZ/rDZ, ratio of intra-pair correlation in monozygotic and dizygotic twin pairs; BM, the best-fitted model according to Akaike information criterion; SNP, single nucleotide polymorphism-based genomic-relatedness-matrix restricted maximum likelihood model; LDSC: linkage disequilibrium score regression model; a<sup>2</sup>, additive genetic variance; d<sup>2</sup>, dominant genetic variance; se, standard error; ADE, model including a<sup>2</sup>, d<sup>2</sup> and non-shared environmental (e<sup>2</sup>) components; AE, model including a<sup>2</sup> and e<sup>2</sup>; ACE, model including a<sup>2</sup>, c<sup>2</sup> and e<sup>2</sup>; LDL, low-density lipoprotein; HDL, high-density lipoprotein; SBP, systolic blood pressure; DBP, diastolic blood pressure; MAP, mean arterial pressure; NA, not available from LD Hub.

\* Statistically significant estimates (P-value<0.05).

† Estimates are based on the largest European ancestry genome-wide association study reported from LD Hub.

**Table S2. LDSC-based Estimates of Cardiometabolic Traits from European Ancestry Data in the LD Hub.**

| Traits                   | Consortium | Sample size | N <sub>SNP</sub> | h <sup>2</sup> | SE | λ <sub>GC</sub> | PMID     |
|--------------------------|------------|-------------|------------------|----------------|----|-----------------|----------|
| Triglycerides            | GLGC       | 96598       | 2692561          | 15%            | 2% | 1.1294          | 20686565 |
|                          | Kettunen   | 21545       | 11820641         | 12%            | 3% | 1.0195          | 27005778 |
| Total Cholesterol        | GLGC       | 99900       | 2692414          | 15%            | 2% | 1.1232          | 20686565 |
|                          | Kettunen   | 21491       | 11866342         | 9%             | 3% | 1.0225          | 27005778 |
| Low-density lipoprotein  | GLGC       | 95454       | 2692565          | 13%            | 2% | 1.1151          | 20686565 |
| Apolipoprotein B         | Kettunen   | 20690       | 11813266         | 11%            | 3% | 1.0255          | 27005778 |
| High-density lipoprotein | GLGC       | 100184      | 2692430          | 16%            | 2% | 1.1622          | 20686565 |
| Apolipoprotein A1        | Kettunen   | 20687       | 11760646         | 9%             | 3% | 1.0165          | 27005778 |
| Hemoglobin A1c           | MAGIC      | 46368       | 2576680          | 7%             | 1% | 1.0405          | 20858683 |
| Glucose                  | MAGIC      | 58074       | 2628880          | 10%            | 2% | 1.0679          | 22581228 |
|                          | Kettunen   | 24679       | 12052259         | 9%             | 2% | 1.0315          | 27005778 |
| Creatinine               | Kettunen   | 24810       | 12087816         | 11%            | 2% | 1.0496          | 27005778 |
| Height                   | GIANT      | 133859      | 2469636          | 27%            | 1% | 1.4122          | 20881960 |
| Body mass index          | GIANT      | 123912      | 2471517          | 19%            | 1% | 1.3675          | 20935630 |
| Waist circumference      | GIANT      | 232101      | 2565409          | 12%            | 0% | 1.1085          | 25673412 |
| Hip circumference        | GIANT      | 213038      | 2559740          | 13%            | 1% | 1.1085          | 25673412 |
| Waist-hip ratio          | GIANT      | 212244      | 2560783          | 11%            | 1% | 1.1617          | 25673412 |

LDSC, linkage disequilibrium score regression model; N<sub>SNP</sub>, number of single nucleotide polymorphisms; h<sup>2</sup>, estimate of heritability; SE, standard error; λ<sub>GC</sub>, genomic inflation factor; PMID, PubMed Unique Identifier; GLGC, the Global Lipids Genetics Consortium; MAGIC, the Meta-Analyses of Glucose and Insulin-related traits Consortium; GIANT, the Genetic Investigation of ANthropometric Traits consortium.
